# Supplementary material for: Glucose-assisted synthesis and wet-chemistry preparation of pyrophosphate cathodes for rechargeable Na-ion batteries
Source: Royal Society of Chemistry journal article supplement (doi:10.1039/c6ra21919e), 2016-01-01
Supplement: c6ra21919e1.pdf [file c6ra21919e1.pdf]

## GLUCOSE-ASSISTED SYNTHESIS AND WET-CHEMISTRY PREPARATION OF PYROPHOSPHATE CATHODES FOR RECHARGEABLE NA-ION BATTERIES

*Cristina Tealdi, Monica Ricci, Chiara Ferrara, Giovanna Bruni, Vittorio Berbenni, Eliana Quartarone, Piercarlo Mustarelli*

### Supplementary Information

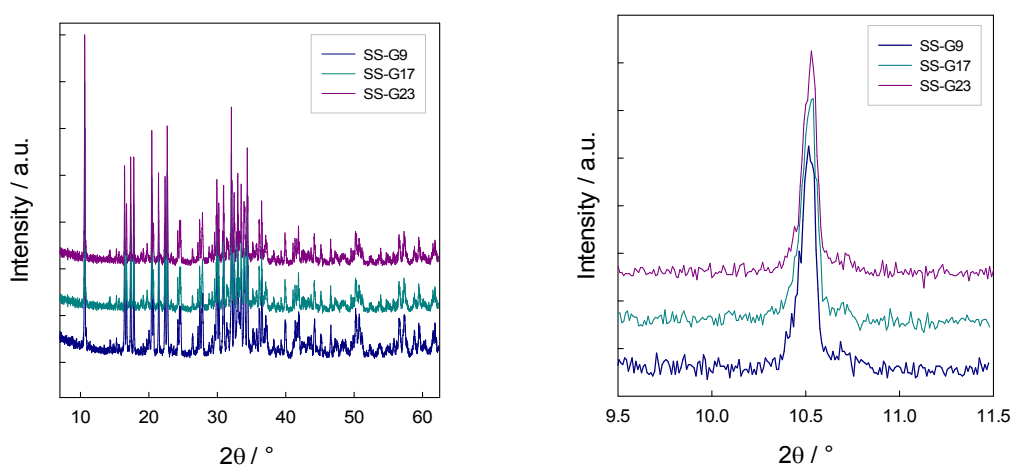

Figure S1- Comparison among the XRPD pattern of the three samples prepared by glucose assisted solid state synthesis.

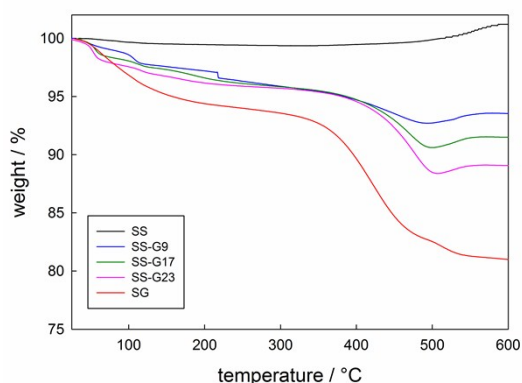

Figure S2- Thermogravimetric profiles of the three samples prepared by solid state reaction with addition of glucose during the synthesis and comparison with a sample prepared by solid state reaction (without glucose) and a sample prepared by sol-gel method.

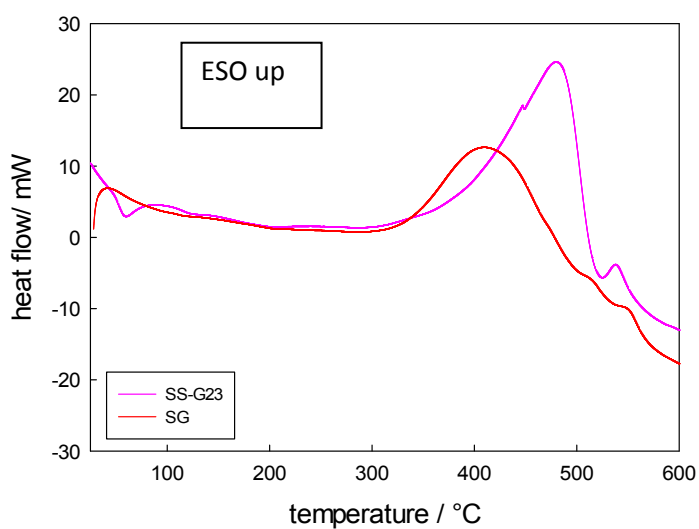

Figure S3- Thermal profiles related to the SS-G23 and SG samples (measurements in air).

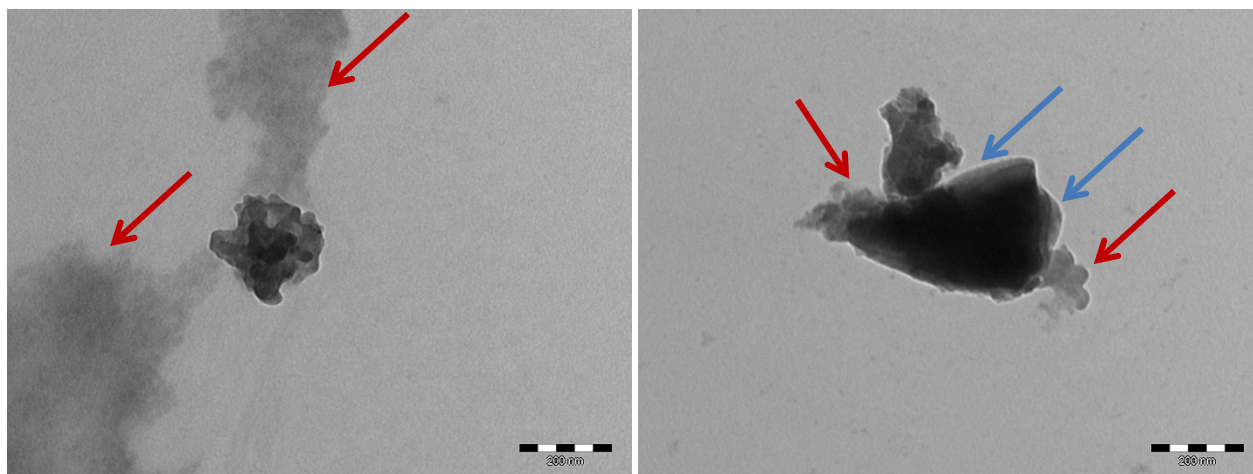

Figure S4 - TEM images of the SS-G9 sample, showing the possible presence of a thin coating of carbon (blue arrow) around the inorganic phase (dark portion of the image), together with a larger portion of amorphous carbon (red arrows).

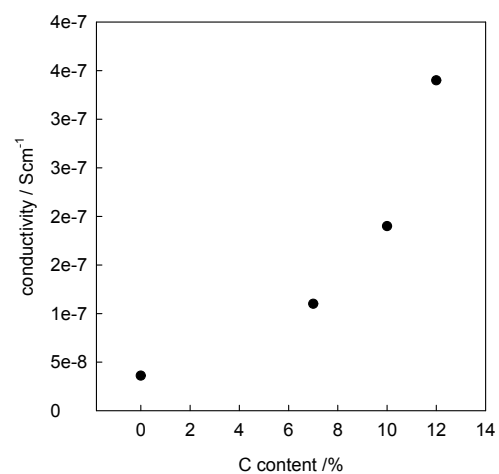

Figure S5 – Room temperature conductivity of the SS-G series as a function of the carbon content.
